# Supplementary material
Source: PubMed Central journal article supplement (PMC8013053)
Supplement: 4138_tables.pdf [file 4138_tables.pdf]

**On-line Table 1: Correlation of neuropsychological assessment score with mean diffusivity in the ETCI group**

| Neuropsychological Tests and Regions     | P Value |
|------------------------------------------|---------|
| WCST (categories completed)              |         |
| Right medial frontal gyrus               | .0001   |
| Left anterior thalamic radiations        | .00001  |
| Right cerebellum posterior lobe          | .0002   |
| Left cerebellum posterior lobe           | .00002  |
| WCST (perseverative response)            | .0001   |
| Left anterior thalamic radiations        | .00001  |
| Right superior longitudinal fasciculus   | .0003   |
| Left superior longitudinal fasciculus    | .00003  |
| Left uncinate fasciculus                 | .00001  |
| Left cerebellum posterior lobe           | .0001   |
| Stroop Test (interference)               |         |
| Left anterior thalamic radiations        | .0001   |
| Right superior longitudinal fasciculus   | .00001  |
| Left cerebellum posterior lobe           | .0001   |
| Color Trails Test                        |         |
| Right anterior thalamic radiations       | .00002  |
| Right superior longitudinal fasciculus   | .00003  |
| Left superior longitudinal fasciculus    | .0001   |
| Line Orientation Test (correct response) |         |
| Right parietal lobe (supramarginal)      | .0001   |
| Right occipital lobe                     | .00004  |
| WMS Spatial Span Test (backward)         |         |
| Right medial frontal gyrus               | .0001   |
| Right cingulate gyrus                    | .00001  |
| Right anterior thalamic radiations       | .0001   |
| Left anterior thalamic radiations        | .00009  |
| Right superior longitudinal fasciculus   | .0001   |
| Right cerebellum posterior lobe          | .00001  |
| WMS Face Recognition Test (IR)           |         |
| Right inferior longitudinal fasciculus   | .00001  |
| WMS Face Recognition Test (DR)           | .0002   |
| Right inferior longitudinal fasciculus   | .00001  |
| Left inferior longitudinal fasciculus    | .00002  |
| RAVLT (IR)                               |         |
| Right inferior longitudinal fasciculus   | .00001  |
| Right uncinate fasciculus                | .0001   |
| Right cerebellum posterior lobe          | .0001   |
| Left cerebellum posterior lobe           | .00004  |
| RAVLT (DR)                               |         |
| Right anterior thalamic radiations       | .0001   |
| Right inferior longitudinal fasciculus   | .00001  |
| Right uncinate fasciculus                | .00003  |

**Note:**—DR indicates delayed recall; IR, immediate recall; RAVLT, Rey Auditory Verbal Learning Test; WCST, Wisconsin Card Sorting Test; WMS, Wechsler Memory Scale.

**On-line Table 2: Correlation of neuropsychological assessment score with radial diffusivity in the ETCI group**

| Neuropsychological Tests and Regions     | P Value |
|------------------------------------------|---------|
| WCST (categories completed)              |         |
| Right medial frontal gyrus               | .0001   |
| Right cingulate gyrus                    | .00001  |
| Left anterior thalamic radiations        | .0002   |
| Right cerebellum posterior lobe          | .0001   |
| Left cerebellum posterior lobe           | .00001  |
| WCST (perseverative response)            |         |
| Left anterior thalamic radiations        | .0001   |
| Right superior longitudinal fasciculus   | .0003   |
| Right inferior longitudinal fasciculus   | .0002   |
| Left uncinate fasciculus                 | .00001  |
| Stroop Test (interference)               |         |
| Left anterior thalamic radiations        | .00001  |
| Right superior longitudinal fasciculus   | .00002  |
| Left superior longitudinal fasciculus    | .0002   |
| Left uncinate fasciculus                 | .0001   |
| Left cerebellum posterior lobe           | .0001   |
| Color Trails Test                        |         |
| Right anterior thalamic radiations       | .00001  |
| Left anterior thalamic radiations        | .0003   |
| Right superior longitudinal fasciculus   | .00004  |
| Left superior longitudinal fasciculus    | .00002  |
| Line Orientation Test (correct response) |         |
| Right parietal lobe (supramarginal)      | .0001   |
| Right occipital lobe                     | .00001  |
| WMS Spatial Span Test (backward)         |         |
| Right medial frontal gyrus               | .0001   |
| Right cingulate gyrus                    | .00002  |
| Right anterior thalamic radiations       | .0001   |
| Left anterior thalamic radiations        | .00001  |
| Right superior longitudinal fasciculus   | .0001   |
| Right cerebellum posterior lobe          | .0001   |
| WMS Face Recognition Test (IR)           |         |
| Right inferior longitudinal fasciculus   | .0001   |
| WMS Face Recognition Test (DR)           |         |
| Right anterior thalamic radiations       | .00001  |
| Right inferior longitudinal fasciculus   | .00006  |
| Left inferior longitudinal fasciculus    | .0001   |
| RAVLT (IR)                               |         |
| Right inferior longitudinal fasciculus   | .00001  |
| Left inferior longitudinal fasciculus    | .0001   |
| Right cerebellum posterior lobe          | .0002   |
| Left cerebellum posterior lobe           | .0001   |
| RAVLT (DR)                               |         |
| Right anterior thalamic radiations       | .0001   |
| Right inferior longitudinal fasciculus   | .00007  |
| Right uncinate fasciculus                | .00001  |

**Note:**—DR indicates delayed recall; IR, immediate recall; RAVLT, Rey Auditory Verbal Learning Test; WCST, Wisconsin Card Sorting Test; WMS, Wechsler Memory Scale.

**On-line Table 3: Correlation of neuropsychological assessment score with axial diffusivity in the ETCl group**

| Neuropsychological Tests and Regions   | P Value |
|----------------------------------------|---------|
| WCST (categories completed)            |         |
| Right cingulate gyrus                  | .00001  |
| Left anterior thalamic radiations      | .0001   |
| Left cerebellum posterior lobe         | .0002   |
| Stroop Test (interference)             |         |
| Left anterior thalamic radiations      | .0001   |
| Right superior longitudinal fasciculus | .00001  |
| Left uncinate fasciculus               | .0002   |
| Left cerebellum posterior lobe         | .00001  |
| Color Trails Test                      |         |
| Right anterior thalamic radiations     | .00003  |
| WMS Face Recognition Test (IR)         |         |
| Right inferior longitudinal fasciculus | .0002   |
| WMS Face Recognition Test (DR)         |         |
| Right inferior longitudinal fasciculus | .00001  |
| Left inferior longitudinal fasciculus  | .00005  |
| RAVLT (IR)                             |         |
| Left inferior longitudinal fasciculus  | .0001   |
| Right uncinate fasciculus              | .00001  |
| Right cerebellum posterior lobe        | .00002  |
| RAVLT (DR)                             |         |
| Right anterior thalamic radiations     | .0001   |
| Right inferior longitudinal fasciculus | .0001   |

**Note:**—DR indicates delayed recall; IR, immediate recall; RAVLT, Rey Auditory Verbal Learning Test; WCST, Wisconsin Card Sorting Test; WMS, Wechsler Memory Scale.
